# Can functional traits explain phylogenetic signal in the composition of a plant community?

Daijiang Li<sup>1\*</sup>, Anthony R. Ives<sup>2</sup>, Donald M. Waller<sup>1</sup>

<sup>1</sup>Department of Botany, University of Wisconsin, 430 Lincoln Drive, Madison, Wisconsin, 53706

<sup>2</sup>Department of Zoology, University of Wisconsin, 430 Lincoln Drive, Madison, Wisconsin, 53706

\* Correspondence: [daijianglee@gmail.com](mailto:daijianglee@gmail.com); [arives@wisc.edu](mailto:arives@wisc.edu); [dmwaller@wisc.edu](mailto:dmwaller@wisc.edu)

**Running title:** Functional traits and phylogeny

**Key words:** Functional traits, community assembly, phylogeny, phylogenetic linear mixed model.

Words in abstract: 223; Words in main text: 4998

Number of references: 43; Number of figures: 2, Number of tables: 4

# ***Abstract:***

Phylogeny-based and functional trait-based analyses are two principle ways to study community assembly and underlying ecological processes. In principle, knowing all information about species traits would make phylogenetic information redundant, at least that component of phylogenetic signal in the distribution of species among communities that is caused by phylogenetically related species sharing similar traits. In reality, phylogenies may contain more information than a set of singular, discretely measured traits because we cannot measure all species traits and may misjudge which are most important. The extent to which functional trait information makes phylogenetic information redundant, however, has not been explicitly studied with empirical data in community ecology. Here, we use phylogenetic linear mixed models to analyze community assembly of 55 understory plant species in 30 forest sites in central Wisconsin. These communities show strong phylogenetic attraction, yet variation among sites in 20 environmental variables could not account for this pattern. Most of the 15 functional traits we measured had strong phylogenetic signal, but only three varied strongly among sites in ways that affected species' abundances. These three traits explained only 19% of variation in phylogenetic patterns of species co-occurrence. Thus, phylogenies appear to provide considerably more information about community assembly than the functional traits measured in this study, demonstrating the value of phylogeny in studying of community assembly processes even with abundant functional traits.

# Introduction

Functional traits, arising as innovations through evolution, can capture essential aspects of species' morphology, ecophysiology, and life-history strategy (McGill *et al.* 2006; Violle *et al.* 2007). Although closely related species can differ greatly in some functional traits due to rapid evolution or convergence (Losos, 2008, 2011), most functional traits show strong phylogenetic signal (Moles *et al.* 2005, Donoghue 2008, Freckleton *et al.* 2002; Webb *et al.* 2002). Functional traits, with or without phylogenetic signal, are known to influence the species composition of communities, thereby providing mechanistic links between fundamental ecological processes and community structure (McGill *et al.* 2006; Violle *et al.* 2007; Adler *et al.* 2013). Functional traits also provide a common currency that facilitates comparisons among species and across regions, allowing us to assess the generality of patterns and predictions in community ecology (McGill *et al.* 2006). This has lead to a proliferation of studies using functional traits to understand community structure and composition. Functional trait-based approaches, however, are limited by the fact that it is impossible to measure all potentially important functional traits affecting the distribution of species across communities.

Even in the absence of functional trait information, it is still possible to infer the effects of (unmeasured) functional traits on community composition by investigating phylogenetic patterns in community composition. Phylogenies play an important role in community ecology by giving information about evolutionary relationships among species (Graves & Gotelli, 1993; Losos 1996; Baum & Smith, 2012). Because phylogenetically related species often share similar functional trait values, we expect phylogenetically related species to co-occur more often in the same communities reflecting their shared environmental tolerances. Conversely, if

phylogenetically related species have similar traits that cause them to compete more, then closely related species may be less likely to co-occur. These and other processes relating functional traits to community composition likely lead to phylogenetic signatures in how species are distributed among communities (Webb *et al.* 2002). However, in principle, if we have information for all relevant functional traits, then we expect phylogeny to provide little additional information relevant for community composition. That is, when all of the functional traits affecting community composition are known, we do not expect the unexplained residual variation in the occurrence of species to have phylogenetic signal (Ives & Helmus, 2011).

In practice, we cannot obtain information about all relevant functional traits. In addition, phylogenetic signals in community composition may result from factors beyond functional traits that generate phylogenetic signal, such as the biogeographical patterns generated as species disperse across a landscape (Ricklefs *et al.* 1993; Moen *et al.* 2009). Therefore, even after accounting for those functional traits whose measurements are available, we should expect phylogenies to contain additional information about community composition (Vane-Wright *et al.* 1991; Cadotte *et al.* 2009). As far as we know, however, no study has explicitly assessed how much information about community assembly provided by traits and phylogeny is overlapping. Here, we ask how much of the phylogenetic signal in the composition of a plant community assemblage can be explained by functional traits (Fig. 1).

To address this question, we take advantage of our data set of 30 understory communities containing a total of 55 species from Wisconsin pine barrens for which we built a highly resolved phylogeny, amassed a large database on 15 functional traits, and measured 20 environmental variables at each community. We first investigate whether there is phylogenetic pattern in community composition, using a phylogenetic community mixed model that tests for both

“phylogenetic attraction” (phylogenetically related species more likely to occur in the same communities) and “phylogenetic repulsion.” If there is phylogenetic pattern, then it could be produced by measured functional traits that themselves have phylogenetic signal (Fig. 1, arrows 2, 4, and 7), unmeasured functional traits with phylogenetic signal (Fig. 1, arrows 2, 5, and 8), or phylogenetic processes unrelated to functional traits (Fig. 1, arrow 6). We then develop a phylogenetic community mixed model incorporating the functional traits we measured to ask whether there is phylogenetic signal in the residual variation in community composition after the effects of these functional traits are removed. This analysis tests the hypothesis that we can explain all the phylogenetic pattern in community composition using measured functional traits. Finally, we use a phylogenetic community mixed model to investigate whether phylogenetically related species respond similarly to environmental gradients across the communities. The motivation for this analysis is to indirectly identify possible unmeasured functional traits that might play a role in community composition. Cases where phylogenetically related species respond similarly to an environmental gradient suggest that they share traits that confer similar tolerances to, or preferences for, specific environmental conditions; this analysis therefore may suggest what additional functional traits to measure in order to explain patterns in community composition.

# Methods

## Data

*Community composition.* – We sampled 30 pine barrens forest sites in the central Wisconsin sand plains in 2012 using 50 1- $m^2$  quadrats placed along five transects at each site. Within each quadrat, we recorded the presence/absence of all vascular plant species (see Li & Waller 2015 for details). Across all sites, we recorded 152 species. For the analyses other than the initial exploration of phylogenetic patterns in community composition, we focused on the 55 species that occurred in three or more communities. This was done for two reasons. First, we did not have values for all functional traits for many of the rare species. Second, we wanted to limit the number of zeros in the data set, especially in analyses of responses of species to environmental variables in which one or two observations of a species give little information.

*Functional traits.* – For the 55 focal species, we measured 11 continuous and four categorical functional traits on at least 12 individuals from at least three populations using standard protocols (Pérez-Harguindeguy *et al.* 2013). Continuous traits include seed mass (g/seed), plant height (cm), specific leaf area (SLA,  $m^2/kg$ ), leaf dry matter content (LDMC, %), leaf circularity (dimensionless), leaf length (cm), leaf width (cm), leaf thickness (mm), leaf carbon concentration (%), leaf nitrogen concentration (%), and stem dry matter content (SDMC, %). We aggregated categories of each categorical trait into two levels: growth form (woody vs. non-woody), life cycle (annual vs. non-annual), and pollination mode (biotic vs. abiotic). We divided seed dispersal mode into three binary variables (wind dispersed vs. not, animal dispersed vs. not, and unassisted vs. assisted dispersal). Collectively, these functional traits, covering the leaf-height-seed (LHS) plant ecology strategy (Westoby, 1998), represent multidimensional functions of

plants associated with resource use, competitive ability, dispersal ability, etc. For analyses, trait values were Z-transformed to have means of zero and standard deviations of one, allowing coefficients in the mixed models to be interpreted as effects sizes.

*Phylogeny.* – The phylogeny used in this study is a subset of a phylogeny for all vascular plants in Wisconsin (Cameron *et al. unpublished manuscript*<sup>1</sup>). Briefly, Cameron *et al.* used two plastid DNA barcode loci *rbcL* and *matK* to build the phylogeny using maximum likelihood (ML) in the program R<sub>AXML</sub> (Stamatakis, 2014). The phylogeny was then time-calibrated using the branch length adjuster (*bladj*) available in the program phylcom (Webb *et al.* 2008).

*Environmental data.* – At each site, we collected six soil samples and then pooled the samples together to measure the soil properties listed in Table 4. We also took six vertical fish-eye photographic images at each site to measure canopy cover. To characterize climatic conditions, we extracted daily precipitation and minimum temperature for each site from interpolated values estimated by Kucharik *et al.* (2010) from 2002 to 2006 (data after 2006 were not available). All environmental variables were also scaled to have means of zero and standard deviations of one.

## Phylogenetic community composition

We first tested for phylogenetic community structure without including environmental or functional trait information. We used traditional metrics and randomization tests (i.e., null models) to identify whether there was phylogenetic pattern (phylogenetic attraction or repulsion) in the composition of our 30 communities. Specifically, we measured the phylogenetic structure of species abundances at each site using phylogenetic species evenness (PSE, Helmus *et al.*

---

<sup>1</sup> Cameron, K., R. Kriebel, M. Pace, D. Spalink, P. Li, and K. Sytsma. *In prep.* A complete molecular community phylogeny for the flora of Wisconsin based on the universal plant DNA barcode.

2007) and mean phylogenetic distance (MPD, Webb, 2000). For a site with  $m$  individuals from  $n$  species, if we let  $\mathbf{M}$  to be a  $n \times 1$  column vector containing abundance of all species and let variance-covariance matrix  $\mathbf{C}$  describing phylogenetic relationship of these species, we can calculate PSE as  $\frac{m \text{diag}(\mathbf{C})' \mathbf{M} - \mathbf{M}' \mathbf{C} \mathbf{M}}{m^2(1-1/n)}$  (the prime denotes transpose) and calculate MPD as  $\frac{\sum_i^n \sum_j^n c_{[i,j]} \mathbf{M}_i \mathbf{M}_j}{\sum_i^n \sum_j^n \mathbf{M}_i \mathbf{M}_j}$ ,  $i \neq j$ . PSE is scaled from zero to one, with one occurring when  $\mathbf{C}$  is the identity matrix and all species have equal abundance. We then calculated the mean of these 30 PSE ( $\overline{\text{PSE}}_{\text{obs}}$ ) and 30 MPD values ( $\overline{\text{MPD}}_{\text{obs}}$ ). To test for phylogenetic pattern using these metrics, we permuted species randomly among sites (SIM2 in Gotelli, 2000) 4999 times and then calculated metrics base on each permutation data set. This null permutation model retains the prevalence of each species across sites, but allows sites to change in species richness. If  $\overline{\text{PSE}}_{\text{obs}}$  or  $\overline{\text{MPD}}_{\text{obs}}$  falls above (or below) 97.5% of the permutation values, then we infer a statistically significant phylogenetic repulsion (attraction). Using this null model where sites can vary in species richness is justified because under the null hypothesis of no phylogenetic signal, the values of PSE and MPD are independent of species richness at the sites.

In addition to testing the significance of the observed PSE and MPD values via null models, we fit a phylogenetic linear mixed model (PLMM) to test for phylogenetic community patterns in species abundances. A PLMM establishes a flexible statistical base to subsequently incorporate functional trait and environmental variables. Furthermore, PLMMs tend to have greater statistical power than other metrics examined using permutation tests (Ives & Helmus, 2011). To build the PLMM, let  $n$  be the number of species distributed among  $m$  sites. Letting  $Y$  be the  $mn \times 1$  vector containing the abundance of species  $j$  ( $j = 1, \dots, n$ ) at site  $s$  ( $s = 1, \dots, m$ ), the PLMM is

$$\log(Y + 1) = \alpha + a_{\text{spp}[i]} + b_{\text{spp}[i]} + c_i + d_{\text{site}[i]} + e_i$$



$$\begin{aligned}
 168 \quad & a \sim \text{Gaussian}(\mathbf{0}, \sigma_a^2 \mathbf{I}_n) \\
 169 \quad & b \sim \text{Gaussian}(\mathbf{0}, \sigma_b^2 \mathbf{S}_{\text{spp}}) \\
 170 \quad & c \sim \text{Gaussian}(\mathbf{0}, \text{kron}(\mathbf{I}_m, \sigma_c^2 \mathbf{S}_{\text{nested}})) \\
 171 \quad & d \sim \text{Gaussian}(\mathbf{0}, \sigma_d^2 \mathbf{I}_m) \\
 172 \quad & e \sim \text{Gaussian}(\mathbf{0}, \sigma_e^2 \mathbf{I}_{mn}) \tag{1}
 \end{aligned}$$

173 We use the convention of multilevel models here (Gelman & Hill, 2007), with fixed and random  
 174 effects given by Greek and Latin letters, respectively. The function  $\text{spp}[i]$  maps the observation  $i$   
 175 in vector  $Y$  to the identity of the species (Gelman & Hill, 2007, p251-252), so  $i$  takes value from  
 176 1 to  $mn$ . The intercept  $\alpha$  estimates the overall average log abundance of species across all sites.  
 177 The following three random variables  $a_{\text{spp}[i]}$ ,  $b_{\text{spp}[i]}$  and  $c_i$  incorporate variation in abundance  
 178 among plant species. Specifically, the  $n$  values of  $a_{\text{spp}[i]}$  give differences among species in mean  
 179 log abundance across all sites and are assumed to be drawn independently from a Gaussian  
 180 distribution with mean 0 and variance  $\sigma_a^2$ . The  $n$  values of  $b_{\text{spp}[i]}$  also give differences in mean log  
 181 abundance across sites but are assumed to be drawn from a multivariate Gaussian distribution  
 182 with covariance matrix  $\sigma_b^2 \mathbf{S}_{\text{spp}}$ , where the  $n \times n$  matrix  $\mathbf{S}_{\text{spp}}$  is derived from the phylogeny (see  
 183 next paragraph below), and the scalar  $\sigma_b^2$  dictates the overall strength of the phylogenetic signal.  
 184 Thus,  $a_{\text{spp}[i]}$  and  $b_{\text{spp}[i]}$  together capture variation in mean species log abundances that is either  
 185 unrelated to phylogeny or has phylogenetic signal. The random variable  $c_i$  accounts for  
 186 covariance in the log abundances of plant species nested within sites (using the Kronecker  
 187 product,  $\otimes$ ). Specifically,  $c_i$  assesses whether phylogenetically related plant species are more or  
 188 less likely to co-occur at the same sites. Hence,  $c_i$  is used to measure either phylogenetic

attraction or phylogenetic repulsion; because  $\sigma_c^2$  dictates the overall strength of these phylogenetic patterns, it is the key term we are interested in. Random effect  $d_{\text{site}[i]}$  is assumed to contain  $m$  values, one for each site, that are distributed by a Gaussian distribution with variance  $\sigma_d^2$  to account for differences in the average log abundances of species from site to site. Finally,  $e_i$  captures residual variance  $\sigma_e^2$ .

We base the phylogenetic covariance matrix  $\mathbf{S}_{\text{spp}}$ , on the assumption of Brownian motion evolution. If a continuous-valued trait evolves up a phylogenetic tree with a constant probability of increasing or decreasing slightly, the covariance in trait values between two species will be proportional to the length of shared evolution, given by the distance on the phylogenetic tree between the root and the species' most recent common ancestor (Martins & Hanson 1997). This gives a direct way to convert the phylogeny into a hypothesis about the covariance matrix. For the assessment of phylogenetic attraction within sites,  $c_i$ , we use  $\mathbf{S}_{\text{nested}} = \mathbf{S}_{\text{spp}}$ . For phylogenetic repulsion, we use the matrix inverse of  $\mathbf{S}_{\text{spp}}$ ,  $\mathbf{S}_{\text{nested}} = (\mathbf{S}_{\text{spp}})^{-1}$ . Theoretical justification for  $\mathbf{S}_{\text{nested}} = (\mathbf{S}_{\text{spp}})^{-1}$  comes from a model of competition among community members (Ives & Helmus 2011, Appendix A). Briefly, if the strength of competition between species is given by  $\mathbf{S}_{\text{spp}}$ , as might be the case if closely related species are more likely to share common resources, then the relative abundances of species will have covariance matrix  $(\mathbf{S}_{\text{spp}})^{-1}$ .

Equation 1 is the same as model I in Ives & Helmus (2011), except model I includes variation among species in mean log abundance across sites as fixed effects rather than two random effects,  $a_{\text{spp}[i]}$  and  $b_{\text{spp}[i]}$ . This change allows us to align equation 1 with equation 3 below that includes variation in the relationship between trait values and log abundance within sites as random effects. In our analyses, treating variation among species in mean log abundance as fixed effects (results not presented) led to almost identical estimates of phylogenetic signal (estimates

of  $\sigma_c^2$ ), and therefore our treatment of  $a_{\text{spp}[i]}$  and  $b_{\text{spp}[i]}$  as random effects does not change the conclusions.

We fit the PLMM with maximum likelihood using function `communityPGLMM` in the `pez` library of R (R Core Team, 2015). Statistical significance of the variance estimates  $\sigma^2$  was determined using a likelihood ratio test. Because the null hypothesis  $\sigma^2 = 0$  is on the boundary of the parameter space (because  $\sigma^2$  cannot be negative), we used the  $0.5\chi_0^2 + 0.5\chi_1^2$  mixture distribution of Self & Liang (1987) for significance tests. The distribution of  $\chi_0^2$  represents a distribution with a point mass at 0, and the  $p$ -values given by the constrained likelihood ratio test are one-half the values that would be calculated from a standard likelihood ratio test using  $\chi_1^2$ . Simulations suggest that  $p$ -values calculated in this way are more conservative than those from a parametric bootstrap (Appendix Text S1).

Our data set contained many zeros, raising the question of the validity of applying a linear model to transformed data. Nonetheless, transforming data and applying a linear analysis is robust when assessing the significance of regression parameters (Ives, 2015). To check this robustness for our results, we repeated all analyses using phylogenetic generalized linear mixed models (PGLMM) after converting our abundance data to presence/absence data. PGLMMs yielded qualitatively similar results in all of the analyses we present in the main text; these PGLMM analyses are presented in Appendix. We present the PLMM results in the main text, because including abundance data in phylogenetic community structure analyses can provide more information about community assembly (Freilich & Connolly, in press).

## Can functional traits explain phylogenetic community composition?

To quantify how much of the variation in phylogenetic patterns can be explained by measured functional traits, we estimated PLMMs with and without functional traits, and then compared the strength of phylogenetic signal in the residual variation: if functional traits alone serve to explain phylogenetic community composition, then as functional traits are included, the strength of the phylogenetic signal in the residuals should decrease. We selected functional traits one by one based on the two conditions necessary for them to generate phylogenetic signal in community composition. First, a functional trait must show phylogenetic signal among species, because in the absence of phylogenetic signal among species, a trait could not produce phylogenetic signal in species' abundances. Second, there must be variation among sites in which species are selected according to their functional traits; if a trait has phylogenetic signal but there is no variation of relationships between plant functional trait values and abundances among sites, then species with similar trait values will also have similar overall abundance. This will contribute to the overall phylogenetic signal of species abundance and will be captured by  $b_{\text{spp}[i]}$  in equation 1. Therefore, we only investigate traits that exhibit both strong phylogenetic signal *and* variation among sites in the apparent advantages the traits give to species.

Phylogenetic signal of functional trait was tested with model-based methods. Each continuous trait was tested with Pagel's  $\lambda$  (Pagel, 1999) using `phylo1m` (Ho & Ané, 2014). For the binary traits, we applied phylogenetic logistic regression (Ives & Garland, 2010) as implemented by `phyloglm` (Ho & Ané, 2014). We also tested phylogenetic signal of functional traits via Blomberg's K (Blomberg *et al.* 2003) with `picante` (Kembel *et al.* 2010).

We tested variation of relationships between trait values and log abundances with the LMM

$$\log(Y + 1) = \alpha + a_{\text{spp}[i]} + (\beta + b_{\text{site}[i]})t_{\text{spp}[i]} + e_i$$

$$a \sim \text{Gaussian}(\mathbf{0}, \sigma_a^2 \mathbf{I}_n)$$

$$b \sim \text{Gaussian}(\mathbf{0}, \sigma_b^2 \mathbf{I}_m)$$

$$e \sim \text{Gaussian}(\mathbf{0}, \sigma_e^2 \mathbf{I}_{mn}) \quad (2)$$

where  $t_{\text{spp}[i]}$  is the focal functional trait value of the species corresponding to observation  $i$ , and  $\sigma_b^2$  gives the variation among sites of the relationship between species trait values and log abundances. If  $\sigma_b^2 > 0$ , we conclude that different sites select species differently based on the tested trait. Significance of  $\sigma_b^2$  was tested with a likelihood ratio test.

We quantified the contribution of a trait to the observed phylogenetic pattern using the model

$$\log(Y + 1) = \alpha + a_{\text{spp}[i]} + b_{\text{spp}[i]} + c_i + d_{\text{site}[i]} + (\beta + f_{\text{site}[i]})t_{\text{spp}[i]} + e_i$$

$$a \sim \text{Gaussian}(\mathbf{0}, \sigma_a^2 \mathbf{I}_n)$$

$$b \sim \text{Gaussian}(\mathbf{0}, \sigma_b^2 \mathbf{S}_{\text{spp}})$$

$$c \sim \text{Gaussian}(\mathbf{0}, \text{kron}(\mathbf{I}_m, \sigma_c^2 \mathbf{S}_{\text{nested}}))$$

$$d \sim \text{Gaussian}(\mathbf{0}, \sigma_d^2 \mathbf{I}_m)$$

$$f \sim \text{Gaussian}(\mathbf{0}, \sigma_f^2 \mathbf{I}_m)$$

$$e \sim \text{Gaussian}(\mathbf{0}, \sigma_e^2 \mathbf{I}_{mn}) \quad (3)$$

This model is the same as equation 1 used to assess phylogenetic patterns in community composition, except that it includes functional trait values  $t_{\text{spp}[i]}$ . Random variables  $a_{\text{spp}[i]}$ ,  $b_{\text{spp}[i]}$ ,

$c_i$ , and  $d_{\text{site}[i]}$  are defined as in equation 1. The proportion of phylogenetic signal in species composition (measured by  $\sigma_c^2$ ) that this trait can explain is then assessed by comparing  $\sigma_c^2$  between models with and without this trait. Finally, to evaluate the overall contribution of functional traits to the observed phylogenetic patterns, we built a multivariate version of equation 3 which included all traits that have both phylogenetic signal *and* strong variation among sites.

## Does any environmental variable drive phylogenetic pattern?

If phylogenetic patterns in community composition are observed, yet no functional traits can explain the patterns, how could we identify additional functional traits that might be responsible? Phylogenetically related species usually are assumed to be ecologically similar due to niche conservatism (Wiens *et al.* 2010). Therefore, related species will tend to have similar responses to environmental variable. If these environmental variables are strong enough to drive phylogenetic patterns in community composition, then functional traits that are associated with tolerance or sensitivity to these environmental variables will likely be important in explaining community composition. Thus, we investigated phylogenetic patterns in the responses of species to environmental variables to suggest additional, unmeasured functional traits that might be important to explain phylogenetic patterns in community composition.

Given the large number of environmental variables we have, we first selected variables for which there is significant variation among species' responses without accounting for their phylogenetic relationships, using linear mixed model (LMM) structured as:

$$\log(Y + 1) = \alpha + a_{\text{spp}[i]} + (\beta + b_{\text{spp}[i]})x_{\text{site}[i]} + e_i$$

$$a \sim \text{Gaussian}(\mathbf{0}, \sigma_a^2 \mathbf{I}_n)$$

$$\begin{aligned}
 293 \quad & b \sim \text{Gaussian}(\mathbf{0}, \sigma_b^2 \mathbf{I}_n) \\
 294 \quad & e \sim \text{Gaussian}(\mathbf{0}, \sigma_e^2 \mathbf{I}_{mn}) \tag{4}
 \end{aligned}$$

295 As in model 1,  $\text{spp}[i]$  gives the species identity of datum  $i$  while  $\text{site}[i]$  gives the site identity of  
 296 datum  $i$ . This makes  $x_{\text{site}[i]}$  the value of the focal environmental variable at the site corresponding  
 297 to observation  $i$  in the data. Variation among species in their response to the environmental  
 298 variable  $x$  is given by the  $\sigma_b^2$  term here. If there is significant variation in species' responses to  
 299 this variable ( $\sigma_b^2 > 0$ ), we then further tested whether phylogenetically related species respond to  
 300 environmental variables in a similar way using the PLMM model

$$\begin{aligned}
 301 \quad & \log(Y + 1) = \alpha + a_{\text{spp}[i]} + b_{\text{spp}[i]} + (\beta + c_{\text{spp}[i]} + d_{\text{spp}[i]})x_{\text{site}[i]} + e_i \\
 302 \quad & a \sim \text{Gaussian}(\mathbf{0}, \sigma_a^2 \mathbf{I}_n) \\
 303 \quad & b \sim \text{Gaussian}(\mathbf{0}, \sigma_b^2 \mathbf{S}_{\text{spp}}) \\
 304 \quad & c \sim \text{Gaussian}(\mathbf{0}, \sigma_c^2 \mathbf{I}_n) \\
 305 \quad & d \sim \text{Gaussian}(\mathbf{0}, \sigma_d^2 \mathbf{S}_{\text{spp}}) \\
 306 \quad & e \sim \text{Gaussian}(\mathbf{0}, \sigma_e^2 \mathbf{I}_{mn}) \tag{5}
 \end{aligned}$$

307 Here,  $c_{\text{spp}[i]}$  and  $d_{\text{spp}[i]}$  represent non-phylogenetic and phylogenetic variation among species in  
 308 their response to environmental variable  $x$  (see model II in Ives & Helmus, 2011). The key  
 309 parameter of interest is  $\sigma_d^2$ , which we tested using a likelihood ratio test. If  $\sigma_d^2 > 0$ ,  
 310 phylogenetically related species respond to environmental variable  $x$  in similar ways, suggesting  
 311 the existence of an unmeasured phylogenetically inherited trait that is associated with species  
 312 tolerances or sensitivities to  $x$ .

## Results

### Phylogenetic community composition

Phylogenetically related species co-occur more often than expected by chance in pine barrens communities in central Wisconsin (Fig. 2). Permutation tests including all 152 species show that closely related species are likely to co-occur within communities, as judged by either phylogenetic species evenness ( $\overline{\text{PSE}}_{\text{obs}} = 0.32, p = 0.03$ ) or mean phylogenetic distance ( $\overline{\text{MPD}}_{\text{obs}} = 338, p = 0.01$ ). Confining the analyses to the 55 focal species that occurred in at least three communities, the permutation tests did not statistically significant phylogenetic patterns ( $\overline{\text{PSE}}_{\text{obs}} = 0.27, p = 0.29$ ;  $\overline{\text{MPD}}_{\text{obs}} = 286, p = 0.17$ ), although the PLMM gave statistically significant phylogenetic patterns ( $p = 0.008$ ; Table 1). Converting the data to presence/absence among communities, the PGLMM also confirmed phylogenetic attraction pattern in these communities (Appendix Table S1). The stronger statistical results for the PLMM and PGLMM are not unexpected, given that model-based approaches are generally statistically more powerful than metric-based approaches (Ives & Helmus 2011).

### Can functional traits explain phylogenetic community composition?

Most functional traits show strong phylogenetic signal (Table 2). Three traits – SLA, leaf circularity, and leaf thickness – significantly affected plant species' abundances among sites ( $\sigma_b^2 > 0$ , equation 2, Table 2). In other words, different sites selected different species based on these three functional traits. Individually, SLA, leaf circularity, and leaf thickness reduced the phylogenetic variance by 6%, 2%, and 6% measured by the reduction in  $\sigma_c^2$  with the inclusion of these functional traits (equation 3). Including all three traits in the final model, the phylogenetic



variation  $\sigma_c^2$  decreased 19%. In other words, the many functional traits we measured in this study can only explain 19% of the phylogenetic signal in species composition among these communities. Converting the data to presence/absence and using the PGLMM,  $\sigma_c^2$  was reduced by 53% (Appendix, Table S2). Thus, functional traits explained more of the phylogenetic patterns in community composition in the presence/absence of species from communities than in their log abundance, although this reduction still only explains about one-half of the phylogenetic pattern in community composition.

## Does any environmental variable drive phylogenetic pattern?

There is significant variation among species in their responses to most environmental variables, including most soil properties we measured, canopy shade, precipitation and minimum temperature (Table 4). However, none of these variables show phylogenetic signal (last column in Table 4). Therefore, no environmental variable we measured can explain the observed phylogenetic pattern in community composition. When using PGLMM with presence/absence data, we found that minimum temperature and soil pH, Ca, and Mn concentration show phylogenetic patterns, with related species showing similar patterns in presence/absence in response to these environmental variables (Appendix Table S3).

## Discussion

We found phylogenetic patterns in community composition, in which phylogenetically related species were more likely to occur in the same communities, yet we could not explain this pattern completely using information among species' functional traits. When functional traits that themselves showed phylogenetic signal were included in the phylogenetic linear mixed model

(PLMM) for log abundances of species in communities, that component of the residual variance having phylogenetic covariances decreased by only 19%. The decrease in the phylogenetic component of residual variation decreased 53% in the analyses of presence/absence data, yet even this leaves considerable phylogenetic pattern in the unexplained variation in the presence/absence of species among communities. Thus, even though we measured 15 functional traits, including most of the “standard” functional traits used for studies on community structure, we could not explain the phylogenetic patterns in community composition. This suggests that there are either important functional traits that we have not measured, or that there are phylogenetic processes unrelated to functional traits that we have not identified.

#### *Phylogenetic community composition*

The permutation tests using PSE and MPD, and the PLMM and PGLMM, found phylogenetic attraction in community composition for the plant communities of central Wisconsin when all 152 species were included. However, only the PLMM and PGLMM found statistically significant phylogenetic patterns when using the subset of 55 species that occurred in three or more communities for which we had complete information on functional traits. Ives & Helmus (2011) found that phylogenetic mixed models have greater power than metrics such as PSE and MPD used with permutation tests to detect phylogenetic community structure. Simulations tailored for our plant community data (Appendix Text S1) showed that the PLMM analyses tended to have, if anything, incorrectly low Type I error rates, implying that our PLMM results were unlikely to be the result of false positives. Therefore, we can conclude that closely related species are more likely to co-occur than expected by chance in these sand plain communities.

#### *Functional traits and phylogenetic patterns*

We used our extensive database of functional traits to answer a key question in trait-based and phylogeny-based community ecology: Can information about functional traits explain phylogenetic patterns in community composition? Incorporating our measured functional traits into a PLMM for log species' abundance only reduced by 19% the phylogenetic component of residual variation in species composition (Table 3). For presence/absence data and a PGLMM, this increased to 53%, although there still remained considerable phylogenetic covariances. A possible explanation for this residual phylogenetic variation is some unknown historical process (Fig. 1B, IV). However, all of our sites are located within 100 km with each other (Li & Waller, 2015), and therefore historical biogeographical processes are unlikely to affect plant community composition.

We think the main source of phylogenetic patterns that were not explained by our measured functional traits is additional functional traits that we did not measure. Further analyses of presence/absence data with PGLMMs suggested that soil pH, Ca and Mn concentrations, and minimum temperature are the potential driving variables for the residual phylogenetic patterns (Appendix Table S3). However, none of the functional traits we measured are likely to explain how plants respond to these environmental variables. Measurements of additional functional traits that control plant performance related to these environmental variables (e.g., root structure, mycorrhizal associations, frost tolerance, etc.) might be able to explain more of the phylogenetic pattern in community composition.

### *Implications for other studies*

Our study has several implications for community ecology. First, it is clear that studying community composition should incorporate analyses of both phylogenetic structure and variation in functional traits. These data clearly complement each other in allowing sophisticated analyses

that can partition the amount of phylogenetic signal in community assembly that is associated with functional trait variation (Fig. 1). Our results provide empirical support for the argument that phylogeny can provide more information than a set of singular, discretely measured traits (Vane-Wright *et al.* 1991; Cadotte *et al.* 2009). Although functional traits are necessary in order to accurately infer processes from phylogenetic patterns (Kraft *et al.* 2007; Cavender-Bares *et al.* 2009), functional traits alone might not give a complete picture of community assembly. This implies that both phylogenetic and trait-based data are needed if we are to understand how measured and unmeasured traits, along with biogeography, influence community composition.

Second, our finding also provides an explanation for different (sometimes even opposite) conclusions about community assembly processes based on comparisons between dispersion patterns of phylogeny and traits (e.g. Swenson & Enquist, 2009; Kraft & Ackerly, 2010; Graham *et al.* 2012). As functional traits and phylogeny provide overlapped and complementary information about species and communities, different conclusions can be possible depend on the functional traits used in the analyses. If the functional traits used provide similar information with phylogeny, then conclusion about community assembly processes may be the same and vice versa. Instead of compare and contrast dispersion patterns of traits and phylogeny, we argue that integrating both into a model-based method such as PLMM used here. Model-based methods are being increasingly applied in ecology because they are more interpretable, flexible, and powerful than either null models or conventional algorithmic multivariate analyses (Warton *et al.* 2014).

With phylogenetic linear mixed models (PLMM), we not only detected phylogenetic patterns in community composition, but also assessed whether these could be explained by functional traits. Thus, both phylogenies and functional traits could be incorporated into the same statistical

model, with PLMMs (and PGLMMs) providing an integrated and quantitative framework for analyzing ecological communities and predicting abundance of one taxon from others.

Finally, we can use phylogenetic analyses to suggest possible unmeasured functional traits that underlie patterns in community composition and that therefore should be measured. If species respond differently to an environmental variable, and if these differences are phylogenetic (i.e., related species respond to the environmental variable in similar ways), then there is likely to be a functional trait or traits that underlie the response of species to this environmental variable. In our study, the phylogenetic patterns in species responses to edaphic conditions like soil chemistry highlighted our lack of data on the specific functional traits related to roots or water/nutrient uptake. While this reveals that our study is incomplete, it also provides a valuable lesson and demonstrates the power of the integrated PLMM approach.

## Acknowledgements

We thank K. Cameron, R. Kriebel, M. Pace, D. Spalink, P. Li, and K. Sytsma for building and providing the phylogeny we used in this study. This project was funded by US-NSF grant DEB-1046355 and DEB-1240804.

## References:

- Adler, P.B., Fajardo, A., Kleinhesselink, A.R. & Kraft, N.J.B. (2013). Trait-based tests of coexistence mechanisms. *Ecology Letters*, 16, 1294–1306.
- Baum, D.A. & Smith, S.D. (2012). *Tree Thinking: An Introduction to Phylogenetic Biology*. 1st Edition edition. Roberts; Company Publishers, Greenwood Village, Colo.
- Cadotte, M.W., Cavender-Bares, J., Tilman, D. & Oakley, T.H. (2009). Using Phylogenetic, Functional and Trait Diversity to Understand Patterns of Plant Community Productivity. *PLoS ONE*, 4, e5695.
- Cavender-Bares, J., Kozak, K.H., Fine, P.V.A. & Kembel, S.W. (2009). The merging of community ecology and phylogenetic biology. *Ecology Letters*, 12, 693–715.
- Donoghue, M.J. (2008). A phylogenetic perspective on the distribution of plant diversity. *Proceedings of the National Academy of Sciences*, 105, 11549–11555.
- Emerson, B.C. & Gillespie, R.G. (2008). Phylogenetic analysis of community assembly and structure over space and time. *Trends in Ecology & Evolution*, 23, 619–630.
- Freckleton, R.P., Harvey, P.H. & Pagel, M. (2002). Phylogenetic Analysis and Comparative Data: A Test and Review of Evidence. *The American Naturalist*, 160, 712–726.
- Freilich, M.A. & Connolly, S.R. (2015). Phylogenetic community structure when competition and environmental filtering determine abundances. *Global Ecology and Biogeography*, n/a–n/a.
- Gelman, A. & Hill, J. (2007). *Data analysis using regression and multilevel/hierarchical models*. Cambridge University Press.
- Gotelli, N.J. (2000). Null model analysis of species co-occurrence patterns. *Ecology*, 81, 2606–2621.
- Graham, C.H., Parra, J.L., Tinoco, B.A., Stiles, F.G. & McGuire, J.A. (2012). Untangling the influence of ecological and evolutionary factors on trait variation across hummingbird assemblages. *Ecology*, 93, S99–S111.

465 Graves, G.R. & Gotelli, N.J. (1993). Assembly of avian mixed-species flocks in Amazonia.  
466 *Proceedings of the National Academy of Sciences*, 90, 1388–1391.

467 Helmus, M.R., Bland, T.J., Williams, C.K. & Ives, A.R. (2007). Phylogenetic Measures of  
468 Biodiversity. *The American Naturalist*, 169, E68–E83.

469 Ho, L.S.T. & Ané, C. (2014). A linear-time algorithm for Gaussian and non-Gaussian trait  
470 evolution models. *Systematic Biology*, syu005.

471 Ives, A.R. & Garland, T. (2010). Phylogenetic Logistic Regression for Binary Dependent  
472 Variables. *Systematic Biology*, 59, 9–26.

473 Ives, A.R. & Helmus, M.R. (2011). Generalized linear mixed models for phylogenetic analyses  
474 of community structure. *Ecological Monographs*, 81, 511–525.

475 Kembel, S.W., Cowan, P.D., Helmus, M.R., Cornwell, W.K., Morlon, H. & Ackerly, D.D.*et al.*  
476 (2010). Picante: R tools for integrating phylogenies and ecology. *Bioinformatics*, 26, 1463–1464.

477 Kraft, N.J.B. & Ackerly, D.D. (2010). Functional trait and phylogenetic tests of community  
478 assembly across spatial scales in an Amazonian forest. *Ecological Monographs*, 80, 401–422.

479 Kraft, N.J.B., Cornwell, W.K., Webb, C.O. & Ackerly, D.D. (2007). Trait Evolution,  
480 Community Assembly, and the Phylogenetic Structure of Ecological Communities. *The*  
481 *American Naturalist*, 170, 271–283.

482 Kucharik, C.J., Serbin, S.P., Vavrus, S., Hopkins, E.J. & Motew, M.M. (2010). Patterns of  
483 Climate Change Across Wisconsin From 1950 to 2006. *Physical Geography*, 31, 1–28.

484 Li, D. & Waller, D. (2015). Drivers of observed biotic homogenization in pine barrens of central  
485 Wisconsin. *Ecology*, 96, 1030–1041.

486 Losos, J.B. (1996). Phylogenetic Perspectives on Community Ecology. *Ecology*, 77, 1344–1354.

487 Losos, J.B. (2008). Phylogenetic niche conservatism, phylogenetic signal and the relationship  
488 between phylogenetic relatedness and ecological similarity among species. *Ecology Letters*, 11,  
489 995–1003.

- Losos, J.B. (2011). Seeing the Forest for the Trees: The Limitations of Phylogenies in Comparative Biology. *The American Naturalist*, 177, 709–727.
- Mayfield, M.M. & Levine, J.M. (2010). Opposing effects of competitive exclusion on the phylogenetic structure of communities: Phylogeny and coexistence. *Ecology Letters*, 13, 1085–1093.
- McGill, B.J., Enquist, B.J., Weiher, E. & Westoby, M. (2006). Rebuilding community ecology from functional traits. *Trends in Ecology & Evolution*, 21, 178–185.
- Moen, D.S., Smith, S.A. & Wiens, J.J. (2009). Community Assembly Through Evolutionary Diversification and Dispersal in Middle American Treefrogs. *Evolution*, 63, 3228–3247.
- Moles, A.T., Ackerly, D.D., Webb, C.O., Tweddle, J.C., Dickie, J.B. & Westoby, M. (2005). A Brief History of Seed Size. *Science*, 307, 576–580.
- Pagel, M. (1999). Inferring the historical patterns of biological evolution. *Nature*, 401, 877–884.
- Pakeman, R.J. & Quested, H.M. (2007). Sampling plant functional traits: What proportion of the species need to be measured? *Applied Vegetation Science*, 10, 91–96.
- Pérez-Harguindeguy, N., Díaz, S., Garnier, E., Lavorel, S., Poorter, H. & Jaureguiberry, P. *et al.* (2013). New handbook for standardised measurement of plant functional traits worldwide. *Australian Journal of Botany*, 61, 167–234.
- Ricklefs, R.E., Schluter, D. & others. (1993). Species diversity in ecological communities: Historical and geographical perspectives. *Species diversity in ecological communities: historical and geographical perspectives*.
- Self, S.G. & Liang, K.-Y. (1987). Asymptotic Properties of Maximum Likelihood Estimators and Likelihood Ratio Tests Under Nonstandard Conditions. *Journal of the American Statistical Association*, 82, 605–610.
- Stamatakis, A. (2014). RAxML Version 8: A tool for Phylogenetic Analysis and Post-Analysis of Large Phylogenies. *Bioinformatics*, btu033.



- Swenson, N.G. & Enquist, B.J. (2009). Opposing assembly mechanisms in a Neotropical dry forest: Implications for phylogenetic and functional community ecology. *Ecology*, 90, 2161–2170.
- Vamosi, S.M., Heard, S.B., Vamosi, J.C. & Webb, C.O. (2009). Emerging patterns in the comparative analysis of phylogenetic community structure. *Molecular Ecology*, 18, 572–592.
- Vane-Wright, R.I., Humphries, C.J. & Williams, P.H. (1991). What to protect? Systematics and the agony of choice. *Biological Conservation*, 55, 235–254.
- Violle, C., Navas, M.L., Vile, D., Kazakou, E., Fortunel, C. & Hummel, I. *et al.* (2007). Let the concept of trait be functional! *Oikos*, 116, 882–892.
- Warton, D.I., Foster, S.D., Death, G., Stoklosa, J. & Dunstan, P.K. (2014). Model-based thinking for community ecology. *Plant Ecology*, 1–14.
- Webb, C.O. (2000). Exploring the phylogenetic structure of ecological communities: An example for rain forest trees. *The American Naturalist*, 156, 145–155.
- Webb, C.O., Ackerly, D.D., McPeck, M.A. & Donoghue, M.J. (2002). Phylogenies and community ecology. *Annual Review of Ecology and Systematics*, 33, 475–505.
- Westoby, M. (1998). A leaf-height-seed (LHS) plant ecology strategy scheme. *Plant and Soil*, 199, 213–227.
- Wiens, J.J., Ackerly, D.D., Allen, A.P., Anacker, B.L., Buckley, L.B. & Cornell, H.V. *et al.* (2010). Niche conservatism as an emerging principle in ecology and conservation biology. *Ecology Letters*, 13, 1310–1324.

## Tables:

Table 1 Estimated variance of random effects for the PLMM (equation 1) used to detect phylogenetic patterns in community composition.

| PLMM                                                                                                       | $\sigma_a^2$ | $\sigma_b^2$           | $\sigma_c^2$           | $\sigma_d^2$            | $\sigma_e^2$ | $p(\sigma_c^2 = 0)$ | AIC  |
|------------------------------------------------------------------------------------------------------------|--------------|------------------------|------------------------|-------------------------|--------------|---------------------|------|
| Phylogenetic attraction:                                                                                   |              |                        |                        |                         |              |                     |      |
| $c \sim \text{Gaussian}(\mathbf{0}, \text{kron}(\mathbf{I}_m, \sigma_c^2 \mathbf{S}_{\text{spp}}))$        | 0.9789       | $1.265 \times 10^{-7}$ | $6.503 \times 10^{-3}$ | $7.712 \times 10^{-10}$ | 0.5154       | 0.008               | 3900 |
| Phylogenetic repulsion:                                                                                    |              |                        |                        |                         |              |                     |      |
| $c \sim \text{Gaussian}(\mathbf{0}, \text{kron}(\mathbf{I}_m, \sigma_c^2 (\mathbf{S}_{\text{spp}})^{-1}))$ | 0.9785       | $1.715 \times 10^{-7}$ | $1.227 \times 10^{-9}$ | $2.282 \times 10^{-2}$  | 0.5308       | 0.496               | 3906 |
| Non-nested model:<br>$c$ removed                                                                           | 0.9838       | $2.287 \times 10^{-2}$ | -                      | $8.828 \times 10^{-7}$  | 0.5306       | -                   | 3904 |

Table 2 Phylogenetic signal and site variation for each functional trait. P-values for the null hypothesis  $\sigma_b^2 = 0$  (equation 2) implying no difference among sites in the effects of trait values on log abundance are given in the column labeled  $p(\sigma_b^2 = 0)$ . Functional traits with strong phylogenetic signal and  $p(\sigma_b^2 = 0) < 0.05$  are considered to be important in explaining phylogenetic patterns.

| Trait                                                | Pagel's $\lambda$ | $K$     | $p(\sigma_b^2 = 0)$ |
|------------------------------------------------------|-------------------|---------|---------------------|
| <b>Leaf specific area (SLA, <math>m^2/kg</math>)</b> | 0.70**            | 0.26**  | <b>0.002</b>        |
| <b>Leaf circularity (Dimensionless)</b>              | 1.00***           | 0.71*** | <b>0.001</b>        |
| <b>Leaf thickness (<math>mm</math>)</b>              | 0.96***           | 1.80*** | <b>0.032</b>        |
| Life cycle (Annual or non-annual)                    | 0.00              | 0.30    | 0.479               |
| Growth habit (woody or non-woody)                    | 1.08***           | 0.24**  | 0.500               |
| Pollination mode (Biotic or abiotic)                 | 0.00              | 0.08    | 0.500               |
| Seed mass ( $g/seed$ )                               | 1.00***           | 0.46    | 0.077               |
| Leaf dry mass content (LDMC, %)                      | 0.52              | 0.16    | 0.500               |
| Stem dry mass content (SDMC, %)                      | 0.00              | 0.14    | 0.500               |
| Plant height ( $cm$ )                                | 0.00              | 0.16    | 0.500               |
| Leaf length ( $cm$ )                                 | 0.98***           | 0.66**  | 0.500               |
| Leaf width ( $cm$ )                                  | 1.00***           | 0.57*** | 0.206               |
| Leaf carbon content (%)                              | 0.65***           | 0.26**  | 0.500               |
| Leaf nitrogen content (%)                            | 0.34              | 0.09    | 0.334               |
| Wind dispersal (Yes or no)                           | 1.15***           | 0.45*** | 0.196               |
| Animal dispersal (Yes or no)                         | 0.64***           | 0.28**  | 0.072               |
| Unassisted dispersal (Yes or no)                     | 0.00              | 0.15    | 0.500               |

\*  $p < 0.05$ , \*\*  $p < 0.01$ , \*\*\*  $p < 0.001$

Table 3 Reduction of the phylogenetic variance in community composition caused by the inclusion of functional traits (equation 3).

| Trait                         | $\sigma_c^2$ with traits | $\sigma_c^2$ without traits | $100 \times \sigma_c^2 \text{ (with traits)} / \sigma_c^2 \text{ (without traits)}$ |
|-------------------------------|--------------------------|-----------------------------|-------------------------------------------------------------------------------------|
| SLA                           | 0.006054                 | 0.006461                    | 6.30                                                                                |
| Leaf circularity              | 0.006304                 | 0.006415                    | 1.73                                                                                |
| Leaf thickness                | 0.006057                 | 0.006459                    | 6.22                                                                                |
| SLA + circularity + thickness | 0.005208                 | 0.006437                    | 19.09                                                                               |

Table 4 Variation in the response of species abundances to environmental variables (equation 4).  
Although 13/20 environmental variables generated variation in species composition among communities,  
none of these showed phylogenetic signal in which related species responded more similarly to the  
environmental variable.

| Environmental variables | $P$ -values $\sigma_c^2$ (no<br>phylogenetic signal) | $P$ -values for $\sigma_d^2$<br>(phylogenetic signal) |
|-------------------------|------------------------------------------------------|-------------------------------------------------------|
| Minimum temperature     | < <b>0.001</b>                                       | 0.500                                                 |
| Precipitation           | < <b>0.001</b>                                       | 0.500                                                 |
| Canopy shade            | <b>0.002</b>                                         | 0.500                                                 |
| Total exchange capacity | <b>0.002</b>                                         | 0.500                                                 |
| Organic matter          | <b>0.001</b>                                         | 0.500                                                 |
| pH                      | < <b>0.001</b>                                       | 0.500                                                 |
| N                       | < <b>0.001</b>                                       | 0.500                                                 |
| P                       | <b>0.039</b>                                         | 0.500                                                 |
| Mg                      | <b>0.030</b>                                         | 0.500                                                 |
| K                       | <b>0.007</b>                                         | 0.500                                                 |
| Na                      | < <b>0.001</b>                                       | 0.500                                                 |
| Mn                      | < <b>0.001</b>                                       | 0.354                                                 |
| Ca                      | < <b>0.001</b>                                       | 0.122                                                 |
| Clay                    | 0.110                                                | -                                                     |
| Silt                    | 0.070                                                | -                                                     |
| Sand                    | 0.117                                                | -                                                     |
| Fe                      | 0.500                                                | -                                                     |
| S                       | 0.458                                                | -                                                     |
| Zn                      | 0.500                                                | -                                                     |
| Al                      | 0.500                                                | -                                                     |

## Figures:

**Figure 1:** Schematic diagram of the conceptual framework of the study. (A) Evolution is the ultimate source of all traits, although only some traits have phylogenetic signal that reflects phylogenetic history (arrows 2, 4 and 5). Other traits do not (arrows 1 and 3), possibly because these traits evolve rapidly or experience convergent evolution. Community composition is determined by unmeasured and measured traits, and also by additional processes that could generate phylogenetic signal, such as biogeographical patterns in the distribution of species. Phylogenetic patterns in community composition can be generated from measured and unmeasured traits with phylogenetic signal (arrows 7 and 8), and by other phylogenetic processes (arrow 6). The question we address is how much of the phylogenetic signal in community composition can be explained by measured functional traits, and whether after accounting for these traits there is residual phylogenetic signal that could have been generated by unmeasured traits or other phylogenetic processes. (B) Traits and phylogeny contain overlapping and complementary information about how communities are assembled. Here, we focus on estimating the proportion of this overlapping information that the phylogeny contains (i.e.,  $\frac{i}{i+ii+iii}$ ). Note that we do not try to explain the proportion of overlapping information that functional traits contain (i.e.,  $\frac{I}{I+II+III}$ ) due to our inability to estimate the amount of information provided by unmeasured traits and hence estimate  $(I + II + III)$ . Note: panel B is just a heuristic diagram.

**Figure 2:** Phylogeny and relative abundance of common plant species found in the pine barrens of central Wisconsin in 2012. The area of dots is proportional to abundances within each site.

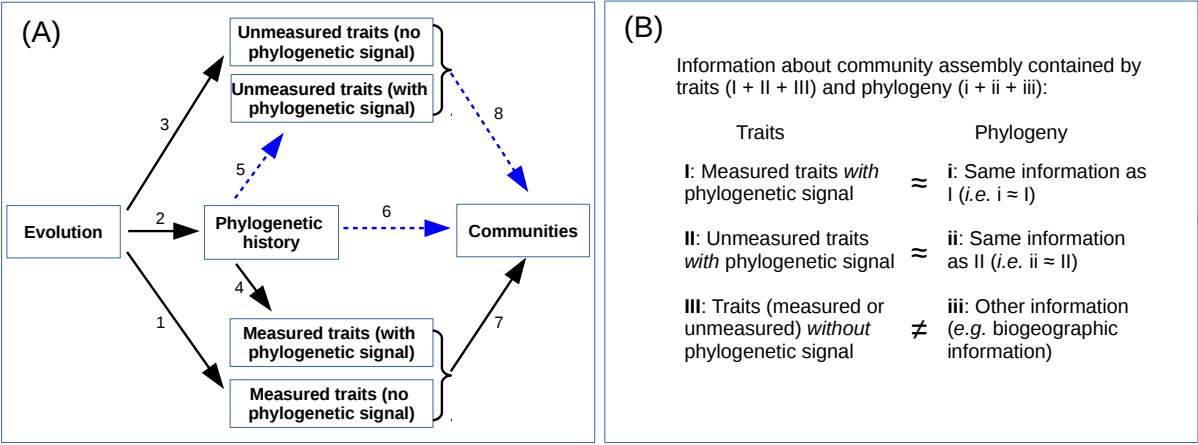

Figure 1

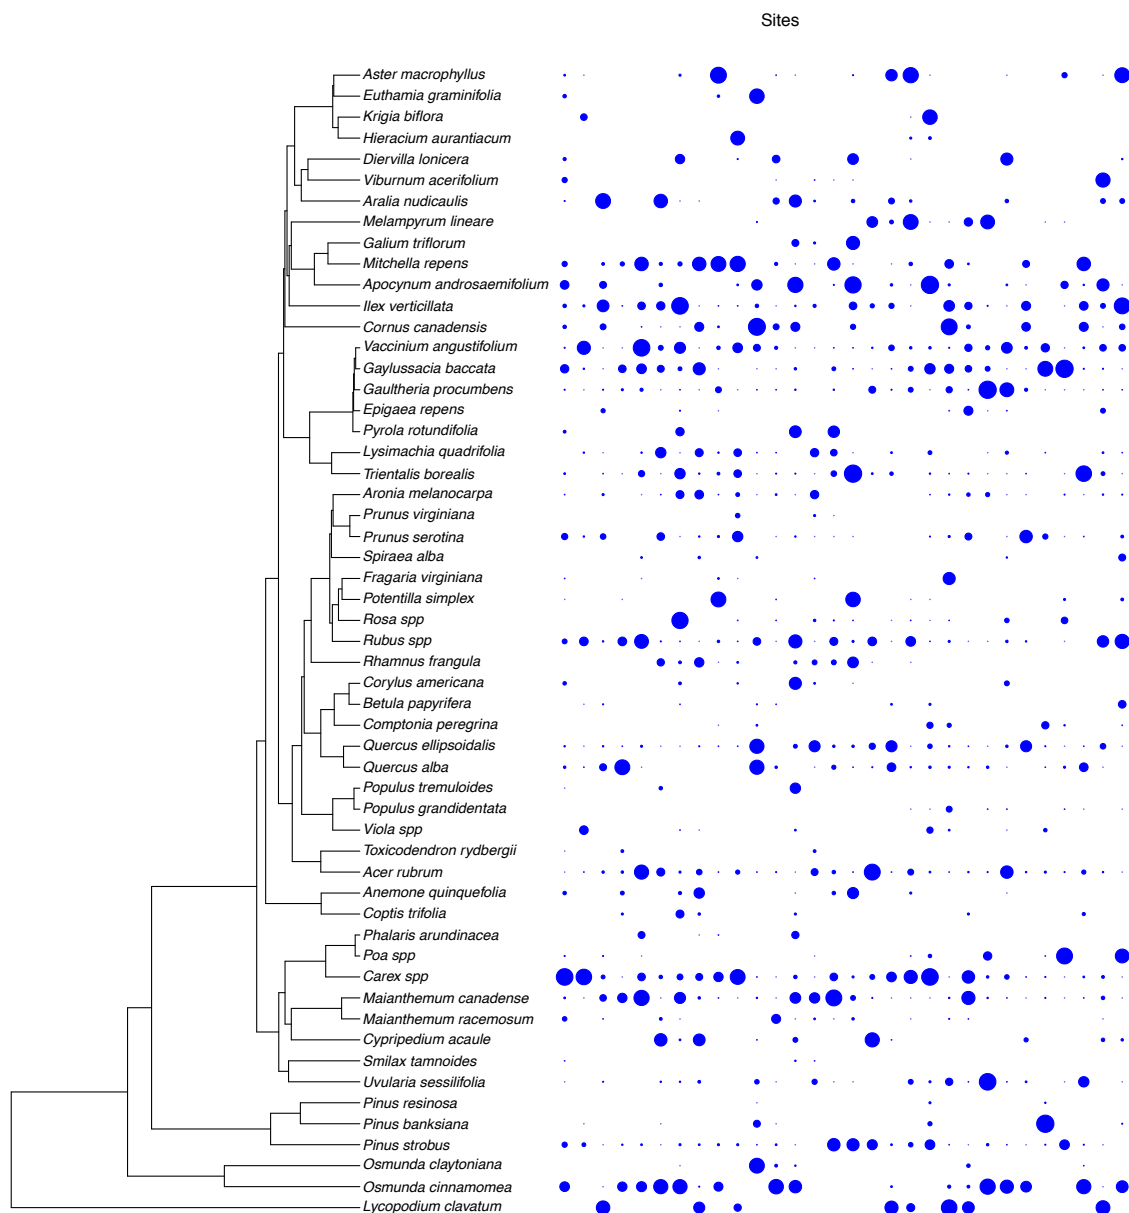

Figure 2



# Appendix

Table S1 Estimated variance of random effects within phylogenetic generalized linear mixed models used to detect phylogenetic patterns (phylogenetic attraction and phylogenetic repulsion, estimated by  $\sigma_c^2$ ).

| Phylogenetic linear mixed models                                                                              | $\sigma_a^2$ | $\sigma_b^2$           | $\sigma_c^2$ | $\sigma_d^2$ | $p(\sigma_c^2 = 0)$ |
|---------------------------------------------------------------------------------------------------------------|--------------|------------------------|--------------|--------------|---------------------|
| Phylogenetic attraction:                                                                                      |              |                        |              |              |                     |
| $\Pr(Y_i = 1) = \text{logit}^{-1}(\alpha + a_{\text{spp}[i]} + b_{\text{spp}[i]} + c_i + d_{\text{site}[i]})$ | 2.8416       | $6.738 \times 10^{-4}$ | 0.0452       | 0.0110       | <0.001              |
| $c \sim \text{Gaussian}(\mathbf{0}, \text{kron}(\mathbf{I}_m, \sigma_c^2 \mathbf{S}_{\text{spp}}))$           |              |                        |              |              |                     |
| Phylogenetic repulsion:                                                                                       |              |                        |              |              |                     |
| $\Pr(Y_i = 1) = \text{logit}^{-1}(\alpha + a_{\text{spp}[i]} + b_{\text{spp}[i]} + c_i + d_{\text{site}[i]})$ | 3.1011       | $1.026 \times 10^{-4}$ | 0.0011       | 0.1936       | 0.5                 |
| $c \sim \text{Gaussian}(\mathbf{0}, \text{kron}(\mathbf{I}_m, \sigma_c^2 (\mathbf{S}_{\text{spp}})^{-1}))$    |              |                        |              |              |                     |
| $\Pr(Y_i = 1) = \text{logit}^{-1}(\alpha + a_{\text{spp}[i]} + b_{\text{spp}[i]} + d_{\text{site}[i]})$       | 2.8323       | $1.454 \times 10^{-5}$ | -            | 0.1796       | -                   |

Table S2 Proportion of phylogenetic signal of species composition in communities explained by individual functional trait and multiple functional traits. With selected multiple functional traits, only about 19% percent of phylogenetic variation was explained, suggesting that phylogenies can provide additional information about community assembly beyond measured functional traits. See equation 3 in the Methods section for details about models.

| Trait                         | $\sigma_c^2$ with trait | $\sigma_c^2$ without trait | $100 \times \sigma_c^2(\text{with trait}) / \sigma_c^2(\text{without trait})$ |
|-------------------------------|-------------------------|----------------------------|-------------------------------------------------------------------------------|
| SLA                           | 0.036213                | 0.042060                   | 13.90                                                                         |
| Leaf circularity              | 0.034731                | 0.041094                   | 15.48                                                                         |
| Leaf thickness                | 0.024457                | 0.042004                   | 41.77                                                                         |
| SLA + circularity + thickness | 0.019557                | 0.044395                   | 53.17                                                                         |

Table S3 There are strong variations in species' relationships between their abundance and most environmental variables (*p* value of each environmental variable was presented in the *P*-values for variation column). However, none of these variations show phylogenetic signal. For environmental variable that has no strong variation in species' responses, no further test for phylogenetic signal of variation was conducted (thus "-" in the third column). P-values that are less than 0.05 are in bold.

| Environmental variables    | P-values for variation | P-values for phylogenetic signal of variation |
|----------------------------|------------------------|-----------------------------------------------|
| <b>Minimum temperature</b> | <b>&lt;0.001</b>       | <b>0.002</b>                                  |
| Precipitation              | <b>&lt;0.001</b>       | 0.500                                         |
| Canopy shade               | <b>0.001</b>           | 0.500                                         |
| Total exchange capacity    | 0.149                  | -                                             |
| Organic matter             | 0.161                  | -                                             |
| <b>pH</b>                  | <b>0.005</b>           | <b>&lt;0.001</b>                              |
| N                          | 0.052                  | -                                             |
| P                          | 0.343                  | -                                             |
| Mg                         | 0.500                  | -                                             |
| K                          | 0.206                  | -                                             |
| Na                         | <b>0.004</b>           | 0.500                                         |
| <b>Mn</b>                  | <b>&lt;0.001</b>       | <b>&lt;0.001</b>                              |
| <b>Ca</b>                  | <b>0.012</b>           | <b>&lt;0.001</b>                              |
| Clay                       | 0.431                  | -                                             |
| Silt                       | 0.494                  | -                                             |
| Sand                       | 0.500                  | -                                             |
| Fe                         | 0.379                  | -                                             |
| S                          | 0.500                  | -                                             |
| Zn                         | 0.500                  | -                                             |
| Al                         | 0.500                  | -                                             |

Text S1 Codes to compare p-values of null hypothesis  $\sigma^2 = 0$  calculated from the  $0.5\chi_0^2 + 0.5\chi_1^2$  mixture distribution and parametric bootstrap. The p-values based on the mixture Chi-square distribution are conservative.

```
# packages used
library(ape) # for phylogeny reading
library(plyr)
library(MASS)
library(dplyr, quietly = TRUE)
library(pez) # for communityPGLMM function
library(parallel) # for multiple cores parallel computation, not available
# for Windows operation system

# data: vegetation data, phylogeny
load("d_li_data.RData")
# select 20 sites and 20 species
test = veg.aggr.wide.1958[1:20, 1:20]
test1 = filter(veg.aggr.long.1958, sp %in% names(test), site %in% rownames(test))

# this function calculates log likelihood of the fitted model on observed
# data, then simulates data based on the fitted model, and fits model on
# simulated data and calculates the log likelihood of the fitted model; then
# calculates the p-value of the log likelihood of the fitted model on
# observed data based all simulated ones (i.e. parametric bootstrap); so we
# can compare the p-value get in this way (parametric bootstrap) with the
# one from the mixture Chi-square distribution.
q1_obs_sim = function(veg.long, phylo = pb.phylo, date = 1958, trans = NULL,
  nsim = 100, ncores = 5) {
  # transformation of freq
  if (!is.null(trans)) {
    if (trans == "log") {
      veg.long$Y <- log(veg.long$freq + 1)
    }

    if (trans == "asin") {
      veg.long <- group_by(veg.long, site) %>% mutate(Y = asin(sqrt((freq + 1)/ifelse(date == 1958, 20 + 2, 50 + 2)))) %>% ungroup() %>%
        as.data.frame()
    }
  }

  veg.long$sp = as.factor(veg.long$sp)
  veg.long$site = as.factor(veg.long$site)
  nspp <- nlevels(veg.long$sp)
  nsite <- nlevels(veg.long$site)

  # Var-cov matrix for phylogeny
  phy <- drop.tip(phylo, tip = phylo$tip.label[!phylo$tip.label %in% levels(veg.long$sp)])
```

```

717 Vphy <- vcv(phy)
718 Vphy <- Vphy[order(phy$tip.label), order(phy$tip.label)]
719 Vphy <- Vphy/max(Vphy)
720 Vphy <- Vphy/det(Vphy)^(1/nspp)
721 Vphy.inv = solve(Vphy)
722
723 show(c(nlevels(veg.long$sp), Ntip(phy))) # should be equal
724
725 # random effect for site
726 re.site <- list(1, site = veg.long$site, covar = diag(nsite))
727 re.sp <- list(1, sp = veg.long$sp, covar = diag(nspp))
728 re.sp.phy <- list(1, sp = veg.long$sp, covar = Vphy)
729 # sp is nested within site, to test phylo attraction or repulsion
730 re.nested.phy <- list(1, sp = veg.long$sp, covar = Vphy, site = veg.long$
731 site)
732 re.nested.rep <- list(1, sp = veg.long$sp, covar = Vphy.inv, site = veg.l
733 ong$site)
734
735 z <- communityPGLMM(Y ~ 1, data = veg.long, family = "gaussian", sp = veg
736 .long$sp, site = veg.long$site, random.effects = list(re.sp, re.sp.phy, re.si
737 te, re.nested.phy), REML = F, verbose = F, s2.init = 0.1)
738 show(z$ss)
739 z0 <- communityPGLMM(Y ~ 1, data = veg.long, family = "gaussian", sp = ve
740 g.long$sp, site = veg.long$site, random.effects = list(re.sp, re.sp.phy, re.s
741 ite),
742 REML = F, verbose = F, s2.init = 0.1)
743 z.rep <- communityPGLMM(Y ~ 1, data = veg.long, family = "gaussian", sp =
744 veg.long$sp, site = veg.long$site, random.effects = list(re.sp, re.sp.phy, re
745 .site, re.nested.rep), REML = F, verbose = F, s2.init = 0.1)
746 show(z.rep$ss)
747
748 # observed output, p-values are get from Chisq approx.
749 output_obs = data.frame(LRT_attract = (z$logLik - z0$logLik), p_attract =
750 pchisq(2 * (z$logLik - z0$logLik), df = 1, lower.tail = F)/2, LRT_repulse = (
751 z.rep$logLik - z0$logLik), p_repulse = pchisq(2 * (z.rep$logLik - z0$logLik),
752 df = 1, lower.tail = F)/2, obs_sim = "obs")
753
754 # the fitting model z0: log(y_i + 1) = alpha + a_spp[i] +
755 # b_spp.phy[i] + c_site[i] + err[i]
756
757 alpha = z0$B # intercept, overall mean of all sp
758 alpha.se = z0$B.se # SE
759 LRT_sim = mclapply(1:nsim, function(x) {
760 # multi-cores
761 set.seed(x)
762 # z0$ss: random effects' SD for the cov matrix \sigma^2 * V, in order
763 : [1]
764 # sp with no phylo; [2] sp with Vphy; [3] site random effect
765 a_spp = rnorm(nspp, 0, z0$ss[1]) # simulate a_spp

```

```

765     # simulate b_spp.phy
766     b_spp.phy = MASS::mvrnorm(1, mu = rep(0, nspp), Sigma = z0$ss[2] * Vp
767 hy)
768     mu_spp = alpha + a_spp + b_spp.phy # mean freq of sp
769     c_site = rnorm(nsite, 0, z0$ss[3]) # site random
770     mu_spp_site = rep(mu_spp, nsite) + rep(c_site, each = nspp) # each s
771 p at each site
772     y_i = rnorm(nspp * nsite, mean = mu_spp_site, sd = alpha.se) # inclu
773 de SE of intercept
774     y_i_count = ceiling(exp(y_i) - 1) # exp transf and round to positive
775 interge
776     test1_sim = data.frame(sp = names(mu_spp_site), site = rep(1:nsite,
777         each = nspp), Y = y_i, freq = y_i_count)
778
779     test1_sim$sp = as.factor(test1_sim$sp)
780     test1_sim$site = as.factor(test1_sim$site)
781
782     # refit models on simulated data random effect for site
783     re.site.sim <- list(1, site = test1_sim$site, covar = diag(nsite))
784     re.sp.sim <- list(1, sp = test1_sim$sp, covar = diag(nspp))
785     re.sp.phy.sim <- list(1, sp = test1_sim$sp, covar = Vphy)
786     # sp is nested within site
787     re.nested.phy.sim <- list(1, sp = test1_sim$sp, covar = Vphy, site =
788 test1_sim$site)
789     re.nested.rep.sim <- list(1, sp = test1_sim$sp, covar = Vphy.inv, sit
790 e = test1_sim$site)
791
792     z_sim <- communityPGLMM(Y ~ 1, data = test1_sim, family = "gaussian",
793         sp = test1_sim$sp, site = test1_sim$site, random.effects = list(r
794 e.sp.sim, re.sp.phy.sim, re.site.sim, re.nested.phy.sim), REML = F, verbose =
795 F, s2.init = 0.1)
796     # show(z_sim$ss)
797     z0_sim <- communityPGLMM(Y ~ 1, data = test1_sim, family = "gaussian"
798 , sp = test1_sim$sp, site = test1_sim$site, random.effects = list(re.sp.sim,
799     re.sp.phy.sim, re.site.sim), REML = F, verbose = F, s2.init =
800 0.1)
801
802     # show(z0_sim$ss)
803     z.rep_sim <- communityPGLMM(Y ~ 1, data = test1_sim, family = "gaussi
804 an", sp = test1_sim$sp, site = test1_sim$site, random.effects = list(re.sp.si
805 m, re.sp.phy.sim, re.site.sim, re.nested.rep.sim), REML = F, verbose = F, s2.
806 init = 0.1)
807     # show(z.rep_sim$ss)
808
809     # Log Lik of refitted models on simulated data
810     data.frame(LRT_attract = (z_sim$logLik - z0_sim$logLik), LRT_repulse
811 = (z.rep_sim$logLik - z0_sim$logLik))
812     }, mc.cores = ncores)
813

```

```

814     # output results
815     list(output_obs, ldply(LRT_sim))
816 }
817
818 qqq = q1_obs_sim(test1, trans = "log", nsim = 1000, ncores = 6)
819 saveRDS(qqq, "qqq.rds")
820
821 qqq = readRDS("qqq.rds")
822 qqq[[1]]
823
824 ##      LRT_attract p_attract  LRT_repulse p_repulse obs_sim
825 ## 1    0.3006013 0.2190598 -1.82719e-05      0.5      obs
826
827 head(qqq[[2]])
828
829 ##      LRT_attract  LRT_repulse
830 ## 1   -0.9611412 -15.68606765
831 ## 2    0.1303866  -0.14712624
832 ## 3   -2.9661583   0.06437319
833 ## 4   -0.2152182  -1.91538503
834 ## 5   -0.4204626   0.04073069
835 ## 6   -1.3125998  -0.40523844
836
837 qqq[[2]]$obs_sim = "sim"
838 q1_sim = rbind(select(qqq[[1]], -p_attract, -p_repulse), qqq[[2]])
839 1 - (rank(q1_sim$LRT_attract)[1] + 1)/1001 # 0.12088 vs 0.219 from Chisq
840
841 ## [1] 0.1208791
842
843 1 - (rank(q1_sim$LRT_repulse)[1] + 1)/1001 # 0.40959 vs 0.5 from Chisq
844
845 ## [1] 0.4095904
846
847
848
849
850
851
852
853
854
855
856
857
858
859
860
861
862
863
864
865
866
867
868
869
870
871
872
873
874
875
876
877
878
879
880
881
882
883
884
885
886
887
888
889
890
891
892
893
894
895
896
897
898
899
900

```
